# Supplementary material for: A novel approach to improving oxidizing-gas sensing ability of p-CuO nanowires using biased radial modulation of a hole-accumulation layer
Source: Royal Society of Chemistry journal article supplement (doi:10.1039/c4tc01182a), 2014-09-24
Supplement: c4tc01182a1.pdf [file c4tc01182a1.pdf]

## Supplementary Information

### **A novel approach to improving oxidizing-gas sensing ability of *p*-CuO nanowires using biased radial modulation of hole- accumulation layer**

**Sun-Woo Choi, Akash Katoch, Jae-Hun Kim, and Sang Sub Kim\***

*Department of Materials Science and Engineering, Inha University, Incheon 402-751,  
Republic of Korea. E-mail address: sangsub@inha.ac.kr; Fax: +82 32 862 5546; Tel:  
+82 32 8607546*

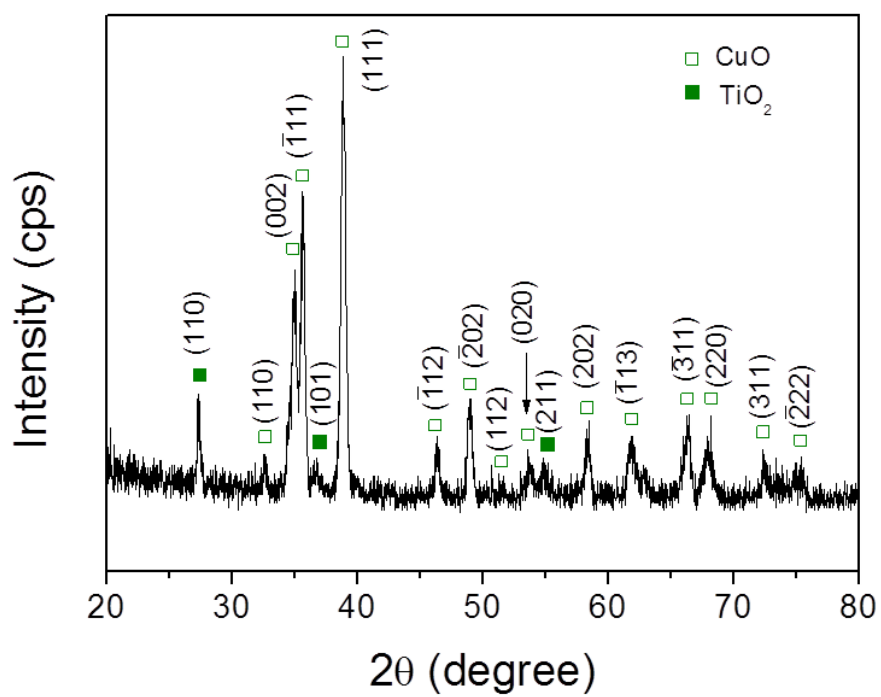

**Fig. S1.** A representative X-ray  $\theta$ - $2\theta$  diffraction pattern for *n*-TiO<sub>2</sub> NPs-attached *p*-CuO NWs used for sensor fabrication.
